## RESEARCH ARTICLE

# The effects of pH and $P_i$ on tension and $Ca^{2+}$ sensitivity of ventricular myofilaments from the anoxia-tolerant painted turtle

Cornelia E. Fanter<sup>1</sup>, Kenneth S. Campbell<sup>2</sup> and Daniel E. Warren<sup>1,\*</sup>

## ABSTRACT

We aimed to determine how increases in intracellular  $H^+$  and inorganic phosphate ( $P_i$ ) to levels observed during anoxic submergence affect contractility in ventricular muscle of the anoxia-tolerant Western painted turtle, *Chrysemys picta bellii*. Skinned multicellular preparations were exposed to six treatments with physiologically relevant levels of pH (7.4, 7.0, 6.6) and  $P_i$  (3 and 8 mmol  $l^{-1}$ ). Each preparation was tested in a range of calcium concentrations (pCa 9.0–4.5) to determine the pCa–tension relationship for each treatment. Acidosis significantly decreased contractility by decreasing  $Ca^{2+}$  sensitivity (pCa<sub>50</sub>) and tension development ( $P < 0.001$ ). Increasing [ $P_i$ ] also decreased contractility by decreasing tension development at every pH level ( $P < 0.001$ ) but, alone, did not affect  $Ca^{2+}$  sensitivity ( $P = 0.689$ ). Simultaneous increases in [ $H^+$ ] and [ $P_i$ ] interacted to attenuate the decreased tension development and  $Ca^{2+}$  sensitivity ( $P < 0.001$ ), possibly reflecting a decreased sensitivity to  $P_i$  when it is present as the dihydrogen phosphate form, which increases as pH decreases. Compared with that of mammals, the ventricle of turtles exhibits higher  $Ca^{2+}$  sensitivity, which is consistent with previous studies of ectothermic vertebrates.

**KEY WORDS:** Acidosis, Calcium, Contractility, Force development, Inorganic phosphate, Reptile

## INTRODUCTION

The western painted turtle, *Chrysemys picta bellii*, is the most anoxia-tolerant tetrapod known, having been shown to survive submergence in anoxic water for more than 170 days at 3°C (Ultsch and Jackson, 1982). During anoxia, the turtle heart maintains a reduced level of cardiac function (Farrell et al., 1994; Herbert and Jackson 1985; Hicks and Farrell, 2000; Hicks and Wang, 1998; Jackson, 1987), in contrast to the mammalian heart, which shows rapid and complete cardiac failure (Boutilier, 2001; Gesser and Jorgensen, 1982; Orchard and Kentish, 1990). Functional suppression in turtles is achieved by minimizing heart rate and contractility, allowing for continued function under conditions unfavorable for high rates of ATP synthesis (Shi et al., 1999; Stecyk et al., 2004; Wasser et al., 1990a,b). Avoiding complete circulatory arrest, however, is necessary to ensure adequate convective transport of glucose from the liver to the periphery and transport of lactic acid to the shell for buffering (Jackson, 1997; Jackson and Heisler, 1982; Jackson et al., 1996; Keiver and Hochachka, 1991; Keiver et al., 1992).

The mechanism of anoxia-induced contractile suppression in turtles is thought to be primarily intrinsic, especially at cooler temperatures, and to involve changes in the sarcoplasm that directly affect myofilament function (Jackson et al., 1995; Stecyk et al., 2009). For example, during anoxia, intracellular lactic acidosis results in a large decrease in intracellular pH ( $pH_i$ ) of the turtle heart (Jackson, 2002; Jackson and Heisler, 1983; Warren and Jackson, 2007). Although the effects of acidosis on ventricular function have been characterized at both the organ and tissue level in painted turtles (Jackson et al., 1995; Shi and Jackson, 1997; Wasser et al., 1990b), the direct effects of  $pH_i$  on myofilament function have yet to be characterized.

Even less well understood is how myofilament function is affected by intracellular inorganic phosphate ( $P_i$ ), which increases during anoxia (Stecyk et al., 2009; Wasser et al., 1990b). In painted turtle hearts, intracellular [ $P_i$ ] increases by 65% during 4 h of anoxia, suggesting rapid [ $P_i$ ] increases may also have a role in immediately decreasing contractility (Wasser et al., 1990b). Atrial myofilaments from the relatively anoxia-tolerant slider turtle, *Trachemys scripta*, showed a 47% decrease in maximal force development as well as reduced  $Ca^{2+}$  sensitivity with a 6 mmol  $l^{-1}$  increase in  $P_i$ , indicating that [ $P_i$ ] may play a role in suppressing ventricular function during anoxia in turtles (Jensen and Gesser, 1999). Furthermore, in mammals, skinned ventricular myocytes showed decreased contractile force and calcium sensitivity when exposed to increasing [ $P_i$ ] (Kentish, 1986). In the heart of slider turtles, intracellular [ $P_i$ ] increases during anoxia from 3.2 to 7.7  $\mu\text{mol g}^{-1}$  at 21°C and from 4.1 to 8.8  $\mu\text{mol g}^{-1}$  at 5°C, suggesting that elevated  $P_i$  may account for some of the functional suppression observed during anoxia (Stecyk et al., 2009). The direct effect that this physiologically relevant increase in [ $P_i$ ] might have on myofilament function in turtle ventricle has yet to be determined.

In the present study, we investigated how physiologically relevant changes in pH and  $P_i$  affect intracellular cardiac mechanics in the ventricle of the anoxia-tolerant painted turtle. By skinning multicellular preparations, we controlled intracellular conditions, allowing for isolated measurements of myofilament tension development. We simultaneously varied pH (6.6, 7.0 and 7.4) and  $P_i$  concentrations (3 and 8 mmol  $l^{-1}$ ) across levels known to exist in the hearts of anoxic turtles while quantifying their effects on myofilament calcium sensitivity (pCa<sub>50</sub>) and force production. We also compared our results with similar studies in other vertebrates to determine how these properties vary across different taxa.

## MATERIALS AND METHODS

## Animals

Western painted turtles, *Chrysemys picta bellii* (Gray 1831) (both sexes, 174–211 g, purchased from Niles Biological, Sacramento, CA, USA) were housed in fiberglass aquaria filled with dechlorinated, St Louis (MO, USA) municipal water (18–22°C) with access to basking platforms bathed with 10 W UV and 90 W incandescent heating lights that followed a weekly updated, natural,

<sup>1</sup>Department of Biology, Saint Louis University, St Louis, MO 63109, USA.

<sup>2</sup>University of Kentucky, Department of Physiology and Division of Cardiovascular Medicine, Lexington, KY 40536, USA.

\*Author for correspondence (daniel.warren@slu.edu)

DOI: 10.1242/jeb.164137

**List of abbreviations**

|                                   |                                                                                                           |
|-----------------------------------|-----------------------------------------------------------------------------------------------------------|
| [Ca <sup>2+</sup> <sub>50</sub> ] | free Ca <sup>2+</sup> concentration required to produce 50% of maximum Ca <sup>2+</sup> activated tension |
| E–C coupling                      | excitation–contraction coupling                                                                           |
| <i>l</i> <sub>0</sub>             | isometric length                                                                                          |
| <i>n</i>                          | Hill constant                                                                                             |
| <i>P</i> <sub>act</sub>           | Ca <sup>2+</sup> activated tension                                                                        |
| <i>P</i> <sub>i</sub>             | intracellular inorganic phosphate                                                                         |
| <i>P</i> <sub>pas</sub>           | passive tension                                                                                           |
| <i>P</i> <sub>total</sub>         | steady-state isometric tension                                                                            |
| pCa <sub>50</sub>                 | calcium sensitivity (–log <sub>10</sub> [Ca <sup>2+</sup> <sub>50</sub> ])                                |
| pH <sub>i</sub>                   | intracellular pH                                                                                          |
| SR                                | sarcoplasmic reticulum                                                                                    |

St Louis photoperiod. They were fed ReptoMin<sup>®</sup> three times a week *ad libitum*, and liver once per week. All housing and animal procedures were approved by the Saint Louis University Institutional Animal Care and Use Committee protocol 2198.

**Muscle preparation**

All muscle preparations were made following previously published protocols (Campbell et al., 2003; Fitzsimons et al., 2001) from halved ventricles previously flash frozen between liquid nitrogen-cooled tongs and stored at –80°C. Each frozen tissue was mechanically disrupted using a Polytron blender in 10 ml of ice-cooled digestion solution that contained the following (in mmol l<sup>–1</sup>): 100 KCl, 20 imidazole, 2 EGTA, 4 ATP, 7 MgCl<sub>2</sub>, 0.04 leupeptin and 0.5 phenylmethanesulfonyl fluoride (PMSF). The resulting homogenate was centrifuged at 650–1360 *g* for 1 min to form a pellet and the supernatant discarded. The pellet was washed by suspension in 10 ml of additional digestion solution, followed by additional centrifugation at 650–1360 *g* for 1 min until pellet formation. After the supernatant was discarded, the pellet was resuspended in digestion solution containing 1% Triton X-100 and placed on a shaker for 20 min at 8°C. If mechanical disruption yielded muscle fragments larger than approximately 1 mm in length, incubation in Triton X-100 was continued for an additional 10 min to ensure adequate membrane permeabilization. Following incubation, the muscle preparations were centrifuged at 650–1360 *g* for 1 min to form a pellet, the supernatant discarded, and the pellet resuspended in 10 ml relax solution with a composition identical to that of the digestion solution except it did not contain leupeptin or PMSF. The preparation was washed at least 2–4 additional times, depending on the presence of visible detergent bubbles, and then stored on ice in 10 ml of relax solution until experimentation.

**Experimental solutions**

The compositions of the pCa solutions used in this study were similar to those from previous studies and are given in Tables S1 and S2 (Campbell and Holbrook, 2007; Campbell and Moss, 2000, 2002; Campbell et al., 2003; Fitzsimons et al., 2001). Six treatments reflected biologically relevant pH levels (7.4, 7.0, 6.6) and *P*<sub>i</sub> levels (3 and 8 mmol l<sup>–1</sup> added *P*<sub>i</sub>). Maxchelator 2.50 software was used to determine pCa (–log<sub>10</sub>[Ca<sup>2+</sup>]) solution compositions as previously described (Campbell and Holbrook, 2007; Campbell et al., 2003), while the following were held constant (in mmol l<sup>–1</sup>): 20 imidazole, 14.5 creatine phosphate, 7 EGTA, 1 Mg<sup>2+</sup> free and 4 MgATP bound. KCl was used to maintain 180 mmol l<sup>–1</sup> ionic strength across batches. The added *P*<sub>i</sub> levels (3 or 8 mmol l<sup>–1</sup>) augmented the basal contaminant *P*<sub>i</sub> which has been estimated at ~0.7 mmol l<sup>–1</sup> (Campbell and Holbrook, 2007).

Solutions were prepared at 22°C, and the appropriate pH was reached using 4 mol l<sup>–1</sup> KOH. For each treatment, 13 different solutions were made to cover a range in Ca<sup>2+</sup> (1–32,000 nmol l<sup>–1</sup>). To obtain intermediate calcium concentrations, solutions with pCa 4.5 and 9.0 were mixed according to proportions determined using Maxchelator 2.50 software. Creatine phosphate was obtained from Santa Cruz Biotechnology (Dallas, TX, USA), ATP was obtained from Roche Life Science (Indianapolis, IN, USA) and CaCl<sub>2</sub> was obtained from Thermo-Fisher Scientific (Waltham, MA, USA). All other reagents were obtained from Sigma-Aldrich (St Louis, MO, USA).

**Experiments**

Skinned multicellular preparations were held between a force transducer (resonant frequency, 600 Hz; model 403, Aurora Scientific, Aurora, ON, Canada) and a motor (Series 602X Servo System, Cambridge Technology Inc., Lexington, MA, USA). Muscle preparations that were approximately 200 μm in length and 10–40 μm in width were chosen for experimentation. Ideally, unicellular preparations would be used to isolate force production specific to intracellular changes; however, force production could not be isolated from experimental noise in these smaller preparations. Pins attached to the force transducer and the motor were coated with 100% clear silicone sealant and subsequently positioned over and pressed into the muscle preparation for 10–15 min, allowing the sealant to set. Once the preparation was attached, the pins were raised, suspending the preparation in relax solution between the force transducer and motor (Fig. 1). The preparation was moved into storing solution (pCa 9.0, pH 7.0, *P*<sub>i</sub> 3 mmol l<sup>–1</sup>), where it was stretched to a sarcomere length of 2.2±0.0034 μm (mean±s.e.m., *N*=24) and held isometrically (isometric length *l*<sub>0</sub>, 146±7.28 μm, *N*=4) at 22°C. Cross-sectional area (CSA) was estimated (2.39±0.246 nm<sup>2</sup>), assuming preparations were cylindrically shaped and preparation width was an accurate representation of diameter.

SLControl 4.5.2 software (www.uky.edu/~kscamp3/SLControl/) was used to perform all experimental stretches and shortenings of the muscle preparations (Campbell and Moss, 2003). Prior to activation, passive tension development (1.92±0.20 kN m<sup>–2</sup>, *N*=12), was measured in relax solution (pCa 9.0, pH 7.0, *P*<sub>i</sub> 3 mmol l<sup>–1</sup>). Preparations underwent two triangular, 0.02 *l*<sub>0</sub> stretches from *l*<sub>0</sub>

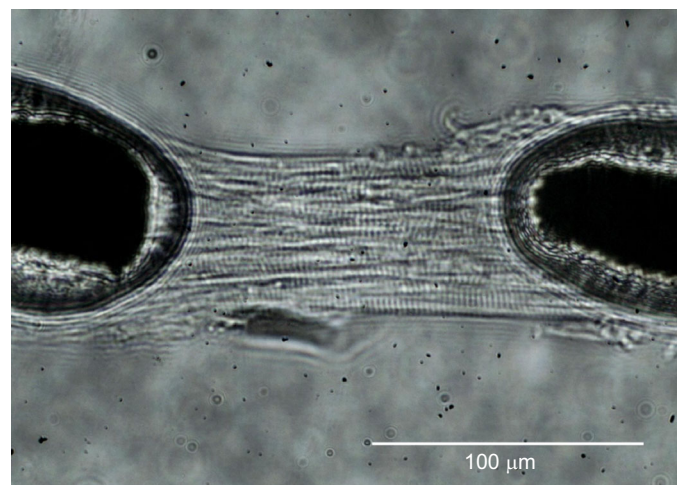

**Fig. 1. Loaded multicellular preparations from turtle ventricle.** A multicellular preparation attached between a motor and a force transducer and stored in pCa 9.0, pH 7.0, 3 mmol l<sup>–1</sup> *P*<sub>i</sub>. The preparation has been stretched to a sarcomere length of 2.2 μm.

(2000 ms duration each), followed by a  $0.1 l_0$  shortening/re-stretch step for 20 ms (Fig. 2). Each preparation was then immersed in a control activation solution of pCa 4.5, pH 7.0,  $P_i$  3 mmol l<sup>-1</sup>, after which tension development was allowed to stabilize to determine control, steady-state isometric tension ( $41.3 \pm 3.8$  kN m<sup>-2</sup>,  $N=12$ ). Each preparation was pseudo-randomly transferred between various pCa solutions (pCa 9.0–4.5) to obtain a Ca<sup>2+</sup> activation curve. To prevent run-down of the muscle, preparations were not introduced to all pCa solutions, and activation was halted after the Ca<sup>2+</sup> activation curve was characterized. A pCa–isometric tension relationship was determined for each treatment (pH 7.4, 7.0 or 6.6 combined with an added  $P_i$  of either 3 or 8 mmol l<sup>-1</sup>). To monitor run-down, preparations were transferred to the control activation solution between every two or three experimental activations. When a preparation began to exhibit run-down, reflected by a decrease in control, steady-state isometric force by greater than 15%, a new preparation from the same ventricular tissue was used to obtain pCa–isometric tension relationships for any remaining treatments.

### Statistical analysis

Tension development curves using the Hill equation were determined to characterize calcium binding affinity to the contractile apparatus:

$$P_{\text{total}} = \frac{P_{\text{pas}} + P_{\text{act}} [\text{Ca}^{2+}]^n}{[\text{Ca}_{50}^{2+}]^n + [\text{Ca}^{2+}]^n}, \quad (1)$$

where  $P_{\text{total}}$  is the steady-state isometric tension,  $P_{\text{pas}}$  is passive tension,  $P_{\text{act}}$  is Ca<sup>2+</sup>-activated tension,  $n$  is the Hill constant and  $[\text{Ca}_{50}^{2+}]$  is the free Ca<sup>2+</sup> concentration needed to produce 50% of maximum Ca<sup>2+</sup> activated tension.  $[\text{Ca}_{50}^{2+}]$  values are reported in this work as pCa<sub>50</sub> values where  $\text{pCa}_{50} = -\log_{10}[\text{Ca}_{50}^{2+}]$ . Relative tension values were calculated by normalizing to the maximum tension measured for the preparation at pH 7.0 and low  $P_i$  (3 mmol l<sup>-1</sup>) in order to remove the influence of differences in absolute force between multicellular preparations.

Model I, two-way ANOVAs were used to determine the effect of pH and  $P_i$  on the curve parameters pCa<sub>50</sub>,  $n$ ,  $P_{\text{pas}}$  and  $P_{\text{act}}$ . When ANOVA revealed a significant treatment effect, *post hoc* analysis was performed using Holm-corrected pairwise *t*-tests to determine differences between treatments. All statistical computations were completed using R package version 3.2.4.

## RESULTS

### Effects of acidosis and $P_i$ on pCa–tension relationships

$P_i$ - and H<sup>+</sup>-induced changes in the pCa–tension relationship were determined by analyzing the changes in pCa–tension curve

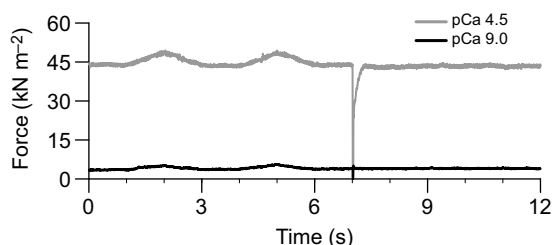

**Fig. 2. Mechanical response to experimental stretching and shortening during activation and inactivation.** At pH 7.0, 3 mmol l<sup>-1</sup>  $P_i$ , a multicellular preparation underwent two  $0.02 l_0$  isometric length ( $l_0$ ) stretches (2000 ms) followed by a  $0.1 l_0$  shortening/re-stretching step (20 ms) at pCa 4.5 (activation) and pCa 9.0 (inactivation). Length changes were separated by 1 s.

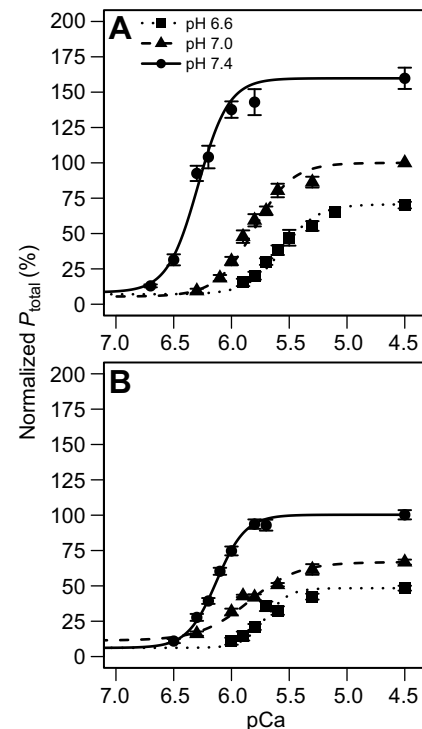

**Fig. 3. pCa–tension curves from turtle ventricular preparations.** Averaged pCa-normalized tension curves at 3 mmol l<sup>-1</sup>  $P_i$  (A) and 8 mmol l<sup>-1</sup>  $P_i$  (B). Steady-state isometric tension ( $P_{\text{total}}$ ) values are expressed as a percentage of tension developed by the same muscle preparation when exposed to pH 7, 3 mmol l<sup>-1</sup>  $P_i$ , at pCa 4.5. Each curve represents the mean of the 12 curves generated from each preparation. The individual data points on the graphs represent means  $\pm$  s.e.m. values where 4–12 measurements were obtained at the same pCa for each of the 12 preparations. Even though 12 curves were constructed for each treatment, measurements were not obtained from every preparation at all of the pCa levels.

parameters (Fig. 3, Table 1). For both  $P_i$  levels, as pH decreased, the pCa–tension curve shifted to the right and plateaued at lower tension values. Higher  $[P_i]$  (Fig. 3B) resulted in curves plateauing at lower tension values than those at lower  $[P_i]$  (Fig. 3A). These changes resulted from significant differences in pCa<sub>50</sub> and in  $P_{\text{act}}$  while acidosis and  $P_i$  had no effect on the Hill constant ( $n$ ) or on passive tension ( $P_{\text{pas}}$ ). The effects of pH and  $P_i$  accumulation on  $P_{\text{act}}$  and pCa<sub>50</sub> were further investigated (see below).

### Effects of acidosis and $P_i$ on pCa<sub>50</sub>

Skinned ventricular myocytes exposed to pH 6.6, 7.0 and 7.4 exhibited pH-induced changes in pCa<sub>50</sub> ( $P < 0.001$ ). At pH 7.4, pCa<sub>50</sub> was  $6.29 \pm 0.03$  at low  $P_i$  and decreased to  $6.13 \pm 0.01$  at high  $P_i$  (Fig. 4A). When pH was decreased from 7.4 to 7.0, pCa<sub>50</sub> significantly decreased to  $5.80 \pm 0.03$  at low  $P_i$  and to  $5.85 \pm 0.03$  at high  $P_i$  ( $P < 0.001$  at both  $P_i$  levels). From pH 7.0 to 6.6, pCa<sub>50</sub> decreased further to  $5.56 \pm 0.03$  ( $P < 0.001$ ) and to  $5.70 \pm 0.03$  ( $P = 0.002$ ), at low and high  $P_i$ , respectively. Taken together, these data show that acidosis decreases pCa<sub>50</sub> and decreases myofilament Ca<sup>2+</sup> sensitivity (Fig. 4B,C).

We also detected a significant interaction between  $P_i$  and pH on pCa<sub>50</sub> ( $P < 0.001$ ), which showed variation in the effects of  $P_i$  on pCa<sub>50</sub> across pH (Fig. 4A). At pH 7.4, low  $P_i$  resulted in a significantly higher pCa<sub>50</sub> at high  $P_i$  ( $P < 0.001$ ). At pH 7.0, there was no significant difference between the two  $P_i$  levels ( $P = 0.298$ ). At pH 6.6, pCa<sub>50</sub> was again significantly different across  $P_i$  levels



**Table 1. Force–pCa relationship curve parameters**

| Treatment                                     | $P_{act}$   | $P_{pas}$  | pCa <sub>50</sub> | $n$       |
|-----------------------------------------------|-------------|------------|-------------------|-----------|
| pH 7.4, 3 mmol l <sup>-1</sup> P <sub>i</sub> | 159.79±7.93 | 8.42±1.87  | 6.29±0.03         | 3.27±0.37 |
| pH 7.0, 3 mmol l <sup>-1</sup> P <sub>i</sub> | 100.00±0.00 | 5.42±0.62  | 5.81±0.03         | 2.64±0.23 |
| pH 6.6, 3 mmol l <sup>-1</sup> P <sub>i</sub> | 70.65±2.48  | 7.05±1.40  | 5.56±0.04         | 2.85±0.32 |
| pH 7.4, 8 mmol l <sup>-1</sup> P <sub>i</sub> | 100.30±3.27 | 6.15±1.06  | 6.13±0.01         | 3.54±0.24 |
| pH 7.0, 8 mmol l <sup>-1</sup> P <sub>i</sub> | 66.81±1.79  | 11.37±1.57 | 5.85±0.03         | 2.04±0.20 |
| pH 6.6, 8 mmol l <sup>-1</sup> P <sub>i</sub> | 48.37±1.72  | 6.17±2.09  | 5.70±0.03         | 4.28±0.75 |

P<sub>i</sub>, inorganic phosphate;  $P_{act}$ , Ca<sup>2+</sup> activated tension;  $P_{pas}$ , passive tension; pCa<sub>50</sub>, calcium sensitivity ( $-\log_{10}[\text{Ca}^{2+}_{50}]$ );  $n$ , Hill constant. All values are means±s.e.m. ( $n=12$  preparations).

( $P=0.002$ ), but in this case, low P<sub>i</sub> resulted in a lower pCa<sub>50</sub> at high pH, the opposite of the observation at pH 7.4.

### Effects of acidosis and P<sub>i</sub> on $P_{act}$

Skinned ventricular preparations exposed to pH 6.6, 7.0 and 7.4 showed pH-induced changes in maximum tension development ( $P<0.001$ ). Between pH 7.4 and 7.0,  $P_{act}$  showed a 36% and 41% decrease at low and high P<sub>i</sub>, respectively. A further decrease down to pH 6.6 caused additional  $P_{act}$  decreases of 33% and 24% at low and high P<sub>i</sub>, respectively. Overall, the decrease in pH from 7.4 to 6.6 produced a 58% decrease in  $P_{act}$  at low P<sub>i</sub> and a 55% decrease at high P<sub>i</sub> (Figs. 5 and 6).

Skinned ventricular preparations were also introduced to high or low [P<sub>i</sub>] to determine whether maximum tension development was affected. Increasing [P<sub>i</sub>] by 5 mmol l<sup>-1</sup> significantly decreased  $P_{act}$  at all pH levels ( $P<0.001$ ). A higher [P<sub>i</sub>] resulted in  $P_{act}$  decreases of 38%, 41% and 34% at pH 7.4, 7.0 and 6.6, respectively. Furthermore, we exposed skinned ventricular preparations to [H<sup>+</sup>] and [P<sub>i</sub>] increases simultaneously to determine whether H<sup>+</sup> and P<sub>i</sub> interacted to modify  $P_{act}$ . The interaction between [H<sup>+</sup>] and [P<sub>i</sub>] significantly attenuated further decreases in  $P_{act}$  ( $P<0.001$ ).

### DISCUSSION

The present study is the first to characterize the contractility of ventricular myofilaments in any reptile, thereby furthering our understanding of how ventricular contractility varies across vertebrate species. We have also elucidated the likely roles of physiologically relevant changes in pH and P<sub>i</sub> on the contractile properties of ventricular myofilaments in mediating the intrinsic functional suppression during anoxia in the most anoxia-tolerant tetrapod, the painted turtle. Contractile properties were characterized by comparing pCa–tension relationship differences resulting from changes in tension development ( $P_{act}$ ) and calcium sensitivity (pCa<sub>50</sub>).  $P_{act}$  decreased in the presence of higher H<sup>+</sup> or higher P<sub>i</sub>. A decrease in pCa<sub>50</sub> was only observed in the presence of higher H<sup>+</sup>. The interaction between P<sub>i</sub> and pH decreased  $P_{act}$  and pCa<sub>50</sub> to a lesser degree compared with acidosis alone.

### Effect of acidosis and P<sub>i</sub> on tension development ( $P_{act}$ )

Unsurprisingly, acidosis had a significant negative effect on  $P_{act}$ , supporting previous suggestions that acidosis is a primary factor mediating functional suppression *in vivo* during anoxia (Shi and Jackson, 1997). The pH effects were quantitatively similar to previous measurements in rats at the same temperature (Fig. 7A). In turtles at both P<sub>i</sub> levels, increasing pH from 7.0 to 7.4 increased tension by ~65% while decreasing pH from 7.0 to 6.6 reduced tension by ~28% (Fig. 7A). Rat ventricular myofilaments showed a 60% increase in  $P_{act}$  when pH was increased from 7.0 to 7.4–7.5 while a decrease in pH from 7.0 to 6.5–6.6 decreased  $P_{act}$  by 25–40% (Fabiato and Fabiato, 1978; Kentish, 1991; Smith and Steele, 1994; Solaro et al., 1988).

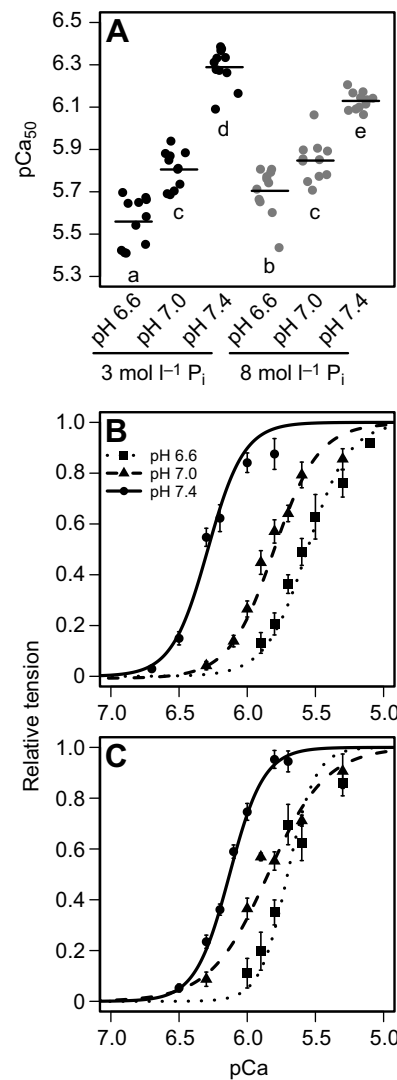

**Fig. 4. Effects of increased H<sup>+</sup> and P<sub>i</sub> on pCa<sub>50</sub>.** (A) pCa<sub>50</sub> values ( $-\log_{10}[\text{Ca}^{2+}_{50}]$ , a measure of calcium sensitivity) are depicted for all pH levels at 3 and 8 mmol l<sup>-1</sup> P<sub>i</sub>, where significant differences are indicated by different letters ( $P<0.05$ ,  $n=12$ ). (B, C) Averaged pCa-normalized tension curves ( $N=12$  preparations) for pH 6.6, 7.0 and 7.4 at 3 mmol l<sup>-1</sup> P<sub>i</sub> (B) and 8 mmol l<sup>-1</sup> P<sub>i</sub> (C). Each curve on the graphs represents the mean of the 12 curves generated from each of the 12 preparations. The individual data points on the graph represent mean±s.e.m. values where 4–12 measurements were obtained at the same pCa level for each of the 12 preparations. Even though 12 curves were constructed for each treatment, measurements were not obtained from every preparation at all of the pCa levels.

Although turtle and rat exhibit similar responses to pH changes at room temperature, the physiological temperatures at which they experience pH changes are different. Mammalian muscle experiences intracellular acidosis during exercise at 37°C, and studies performed at 30°C indicated that  $P_{act}$  is less sensitive to acidosis than at lower temperatures (Knuth et al., 2006; Nelson et al., 2014; Nelson and Fitts, 2014; Orchard et al., 1991; Orchard and Kentish, 1990; Pate et al., 1995). This has led to the general belief that acidosis may only have minor *in vivo* effects on  $P_{act}$  in mammalian muscle at the physiologically relevant temperature of 37°C (Debold, 2012). In contrast, turtles experience a broad range of body temperatures, from 3°C while overwintering to more than 30°C in summer. Anoxia-induced intracellular acidosis is most likely to occur during winter, so the more pronounced

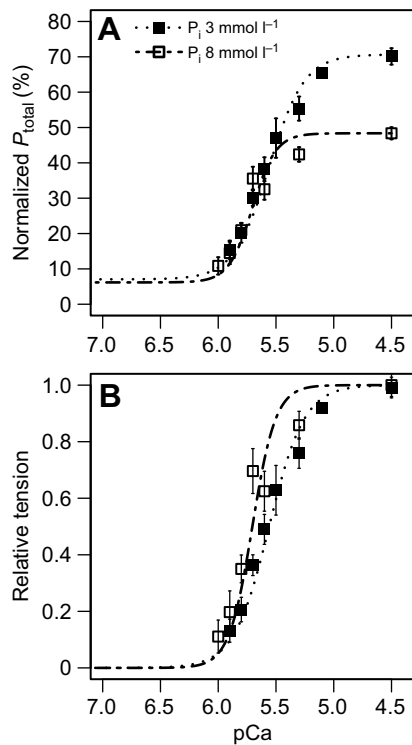

**Fig. 5. Effect of  $P_i$  at pH 6.6.** All values are means  $\pm$  s.e.m. from 12 preparations. (A) Averaged pCa-normalized tension curves at 3 and 8 mmol  $\text{l}^{-1}$   $P_i$ .  $P_{\text{total}}$  values are expressed as a percentage of tension developed by the same muscle preparation when exposed to pH 7, 3 mmol  $\text{l}^{-1}$   $P_i$ , at pCa 4.5. (B) Relative tension curves for pH 6.6 are depicted at 3 and 8 mmol  $\text{l}^{-1}$   $P_i$ .

pH-dependent changes in mammalian  $P_{\text{act}}$  observed at lower temperatures suggest that acidosis may be especially important in reducing  $P_{\text{act}}$  and, therefore, suppressing contractility of cardiac myofilaments *in vivo* in the anoxic turtle. Clearly, additional studies at temperatures colder than 20°C are needed to confirm this hypothesis.

Increasing  $[P_i]$  also decreased  $P_{\text{act}}$  in turtle ventricular myofilaments. We observed a  $\sim 40\%$  decrease in  $P_{\text{act}}$  across all pH levels with a 5 mmol  $\text{l}^{-1}$  increase in  $P_i$  (Fig. 3), a response that is

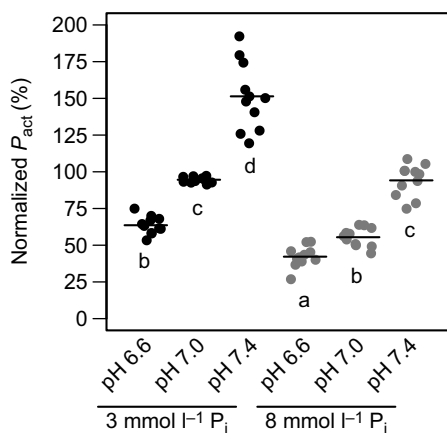

**Fig. 6. Effects of  $H^+$  and  $P_i$  elevation on active tension at pCa 4.5.**  $\text{Ca}^{2+}$ -activated tension ( $P_{\text{act}}$ ) values are expressed as a percentage of tension developed by the same muscle preparation when exposed to pH 7, 3 mmol  $\text{l}^{-1}$   $P_i$ , at pCa 4.5. Significant differences are indicated by different letters ( $P < 0.05$ ,  $n = 12$  preparations).

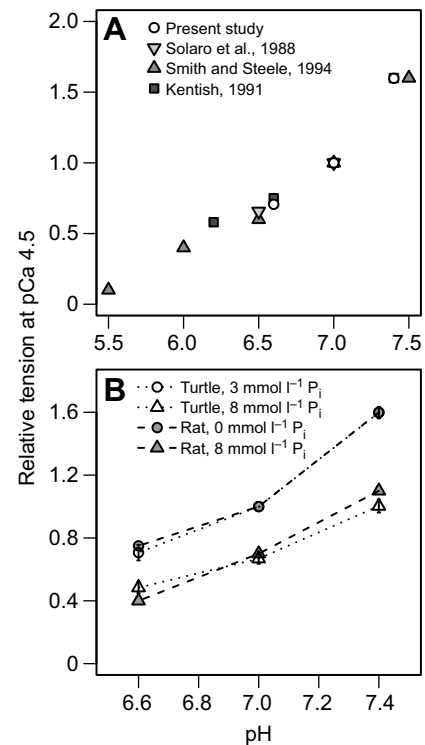

**Fig. 7. Effects of  $H^+$  and  $P_i$  on maximum tension development in skinned myocardium from mammals and turtle.** (A) Comparison of the effect of acidosis on relative tension development between turtle and rat ventricle (Solaro et al., 1988; Smith and Steele, 1994; Kentish, 1991). (B) The effect of acidosis on relative tension at low and high  $P_i$  levels (5 mmol  $\text{l}^{-1}$  increase) in both rat and turtle ventricle. All values are normalized to pH 7.0, pCa 4.5 at low  $[P_i]$ .

similar to that observed in mammalian striated muscle (Nelson and Fitts, 2014; Palmer and Kentish, 1994). It is hypothesized that increasing intracellular  $[P_i]$  drives a reversal in the cross-bridge cycle, which shifts cross-bridges from a state of high tension development to a state of lower tension development where a greater proportion of myosin heads are bound to  $P_i$  (Palmer and Kentish, 1994; Takagi et al., 2004). This is likely the mechanistic cause of the  $P_i$ -induced  $P_{\text{act}}$  decrement observed in this study.

Although increased  $P_i$  decreased  $P_{\text{act}}$  in turtle, the physiologically relevant  $P_i$  increase did not decrease  $P_{\text{act}}$  by the same magnitude as the physiologically relevant decrease in pH, indicating acidosis is probably the more important factor during anoxia. For example, at pH 7.4, increasing  $P_i$  by 5 mmol  $\text{l}^{-1}$  only decreased tension by 38%, while the physiologically relevant decrease in pH at 3 mmol  $\text{l}^{-1}$   $P_i$  decreased it by 58%. In turtles, studies of whole ventricle and ventricular strips have suggested that acidosis contributes to cardiac functional suppression during anoxia (Jackson, 1987; Overgaard et al., 2005; Wasser et al., 1991); however, other work has suggested that the changing levels of energetic components, such as increasing  $[P_i]$ , may account for the cardiac functional suppression observed during anoxia (Stecyk et al., 2009). This is the first study to compare the effects of intracellular pH and  $P_i$  changes on ventricular myofilament function in turtles, and the large decrease in tension development due to acidosis further supports the notion that acidosis plays a more significant role in functional suppression of the turtle heart during anoxia.

The statistical interaction between  $[P_i]$  and pH indicates that when both  $P_i$  and  $H^+$  are at high concentrations, the decrease in  $P_{\text{act}}$  may be slightly attenuated in turtles (Fig. 6), which differs from mammalian

striated muscle, where no such attenuation occurs (Eisner et al., 1987; Kentish, 1991; Wilkie, 1986; Wilson et al., 1988). In a previous study of rat ventricle, relative tension was measured at pH 6.6, 7.0 and 7.4 at two levels of  $P_i$  differing by 5 mmol l<sup>-1</sup> (Kentish, 1991), the results of which we have plotted alongside the results from our present study in Fig. 7B. For this comparison, maximum tension values were normalized to pH 7.0 of the lower  $P_i$  concentration for the two studies (0 and 3 mmol l<sup>-1</sup> for rat and turtle, respectively). Although no statistical comparisons can be made, the effect of increased  $P_i$  on pH-dependent  $P_{act}$  appears strikingly similar between the two species, despite the unique attenuation effect observed in turtle preparations. Further studies at identical  $[P_i]$  levels are required to make comparisons across species regarding the  $P_i$ –pH interaction effect on  $P_{act}$ .

### Effect of acidosis and $P_i$ on calcium sensitivity

A second mechanism by which pH and  $P_i$  can alter cardiac contractility is by changing the myofilament sensitivity to  $Ca^{2+}$ . This can be assessed by measuring the tension–pCa relationship and thus the pCa<sub>50</sub> under different conditions. We found a clear right-shift in the tension–pCa relationship curve (increased pCa<sub>50</sub>) as  $[H^+]$  increased (Fig. 4), indicating a decrease in the  $Ca^{2+}$  sensitivity of turtle ventricular myofilaments with acidosis, an effect long-known to occur in mammals (Fabiato and Fabiato, 1978; Orchard et al., 1991; Orchard and Kentish, 1990; Solaro et al., 1988). In contrast, increasing  $P_i$  from 3 to 8 mmol l<sup>-1</sup> at pH 7.0 had no statistically significant effect on  $Ca^{2+}$  sensitivity in the present study (Fig. 4A). This differs somewhat from rats, which showed significant decreases in  $Ca^{2+}$  sensitivity with much larger  $P_i$  increases (20 mmol l<sup>-1</sup>) (Palmer and Kentish, 1994). Turtle atrial trabeculae also exhibited decreased  $Ca^{2+}$  sensitivity with increasing  $P_i$  concentration (Jensen and Gesser, 1999). Although we cannot rule out the possibility that higher levels of  $P_i$  might also have decreased  $Ca^{2+}$  sensitivity, we are able to conclude that physiologically relevant increases in  $P_i$  are insufficient to cause any change in myofilament  $Ca^{2+}$  sensitivity and that *in vivo* contractile suppression in anoxic turtles is at least partly related to decreases in pCa<sub>50</sub> by acidosis.

Just as there were interactive effects of  $P_i$  and pH on  $P_{act}$ , we also found interactive effects on pCa<sub>50</sub> (Fig. 4A). At pH 7.4, increasing  $P_i$  by 5 mmol l<sup>-1</sup> decreased pCa<sub>50</sub>, while at pH 6.6, the 5 mmol l<sup>-1</sup>  $P_i$  increase rescued pCa<sub>50</sub>. Although there was no statistical effect of  $P_i$  or pH on the Hill constant ( $n$ ), closer examination of the relative tension curves at pH 6.6 indicates that there may be a difference in  $n$  at pH 6.6, which in turn may impact pCa<sub>50</sub> (Fig. 5B). Additionally,

the pH– $P_i$  interaction may impact myofilament cooperativity, which could cause a change in myofilament tension kinetics that determine pCa<sub>50</sub>. Regardless, the results suggest that intracellular acidosis is the primary cause of decreased myofilament  $Ca^{2+}$  sensitivity in this preparation and probably accounts for contractile suppression, *in vivo*, in the anoxic turtle ventricle.

### Calcium sensitivity across species

Our study provides further evidence that high calcium sensitivity is a general property of the ectothermic myofilament apparatus in ventricular tissue (Table 2). Comparison of the properties of the myofilaments from turtle ventricle with previously published values for mammalian ventricle reveals that turtles have a higher calcium sensitivity. At pH 7.0, mammalian ventricular pCa<sub>50</sub> ranges from 5.29 to 5.57, while turtle pCa<sub>50</sub> was 5.81 (Bers, 1991; Harrison and Bers, 1989, 1990; Palmer and Kentish, 1994). Only at pH 6.6, 3 mmol l<sup>-1</sup>  $P_i$  did turtle ventricular myofilaments exhibit a pCa<sub>50</sub> within the range of mammals, where pCa<sub>50</sub> decreased to 5.56. Similar to turtle cardiomyocytes, frog ventricular myocytes exhibited a pCa<sub>50</sub> of 5.87 at pH 7.0, 20°C, indicating a higher  $Ca^{2+}$  sensitivity than in mammals (Brandt et al., 1998). Studies of frog and rainbow trout ventricular myofilaments have also shown higher sensitivity to  $Ca^{2+}$  than mammalian ventricular myofilaments, regardless of temperature (Churcott et al., 1994; Harrison and Bers, 1990). It is reasonable to suspect that differences in pCa<sub>50</sub> across species are caused by variation in the isoforms of troponin C (TnC) and troponin I (TnI), which accounts for tissue-specific pCa<sub>50</sub> differences in mammals (Debold, 2012).

The higher ventricular myofilament calcium sensitivity of ectotherms makes sense when considering the differing roles of the sarcoplasmic reticulum (SR) in excitation–contraction (E–C) coupling across vertebrates and their relative heart rates. Mammals have a well-developed, highly organized SR that allows for large calcium transients during E–C coupling (Barceñas-Ruiz and Wier, 1987; DuBell and Houser, 1989) and their high heart rates necessitate a lower pCa to insure rapid relaxation and return to diastole. In contrast, turtle ventricular myocardium relies comparatively less on the SR for  $Ca^{2+}$  during contraction (Galli et al., 2006a,b), as does that of frogs (Fabiato, 1982; Morad et al., 1981) and fish. (Hove-Madsen et al., 1999; Shiels and Galli, 2014; Tibbits et al., 1991; Vornanen, 1989; Vornanen and Haverinen, 2013). It has recently been proposed that the SR in ectotherms may be more important during times of physiological stress (Cros et al., 2014) or in supporting the contractile requirements of more aerobic

**Table 2. Ventricular myofilament  $Ca^{2+}$  sensitivity of different species at pH 7.0**

| Citation                 | Species                       | Common name            | Temperature (°C) | pCa <sub>50</sub> |
|--------------------------|-------------------------------|------------------------|------------------|-------------------|
| Churcott et al., 1994    | <i>Oncorhynchus mykiss</i>    | Rainbow trout          | 21.0             | 6.49              |
| Churcott et al., 1994    | <i>Rattus norvegicus</i>      | Rat                    | 21.0             | 6.24              |
| Brandt et al., 1998      | Frog*                         | Frog                   | 20.0             | 5.87              |
| Present study            | <i>Chrysemys picta bellii</i> | Western painted turtle | 22.0             | 5.81              |
| Godt et al., 1991        | <i>Gallus gallus</i>          | Chicken                | 22.0             | 5.65              |
| Harrison and Bers, 1990  | <i>Rana pipiens</i>           | Frog                   | 22.0             | 5.62              |
| Palmer and Kentish, 1994 | <i>Oryctolagus cuniculus</i>  | Rabbit                 | 25.0             | 5.57              |
| Harrison and Bers, 1989  | <i>Oryctolagus cuniculus</i>  | Rabbit                 | 29.0             | 5.49              |
| Harrison and Bers, 1990  | <i>Rattus norvegicus</i>      | Rat                    | 29.0             | 5.33              |
| Harrison and Bers, 1990  | <i>Cavia porcellus</i>        | Guinea pig             | 29.0             | 5.29              |
| Harrison and Bers, 1990  | <i>Rana pipiens</i>           | Frog                   | 1.0              | 5.02              |
| Harrison and Bers, 1990  | <i>Rana pipiens</i>           | Frog                   | 1.0              | 5.02              |
| Harrison and Bers, 1990  | <i>Cavia porcellus</i>        | Guinea pig             | 1.0              | 4.74              |
| Harrison and Bers, 1989  | <i>Oryctolagus cuniculus</i>  | Rabbit                 | 1.0              | 4.73              |
| Harrison and Bers, 1990  | <i>Rattus norvegicus</i>      | Rat                    | 1.0              | 4.68              |

\*Species name was not stated.

ectothermic species, such as varanid lizards (Galli et al., 2009; Warren et al., 2010). Interestingly, the chicken ventricle shows a  $pCa_{50}$  of 5.65 at 22°C, which occupies an intermediate calcium sensitivity between mammals and ectothermic vertebrates (Godt et al., 1991), although birds do utilize the SR as a calcium source during contraction (Gwathmey and Morgan, 1991).

### Calcium sensitivity within the heart

Our study suggests that cardiac myofilament  $Ca^{2+}$  sensitivity varies not only across species but also within the turtle heart. Turtle atrial trabeculae exhibited less sensitivity to calcium with a  $pCa_{50}$  of 5.67 (pH 7.35–7.45) (Jensen and Gesser, 1999), compared with that for a  $pCa_{50}$  of 6.29 (pH 7.4) observed in this study. Atrial tissue also exhibits a reduced  $Ca^{2+}$  sensitivity in both pigs and humans (Morano et al., 1988). This is not true of all vertebrates, however, as frog atrial and ventricular tissues have similar  $Ca^{2+}$  sensitivities (Brandt et al., 1998).

### Conclusions

We have shown that acidosis has profound negative effects on both tension development and  $Ca^{2+}$  sensitivity in skinned ventricular cardiomyocytes from turtles, while increased  $[P_i]$  has smaller effects only on tension development, and none on  $Ca^{2+}$  sensitivity. By extending these functional data to the tissue and organ level in the anoxic painted turtle, we can conclude that the intrinsic functional suppression in the ventricular myocardium is primarily from intracellular acidosis. This agrees with previous studies at the organ and tissue level that support a larger role for acidosis in functional suppression of cardiac function in anoxic turtles (Jackson, 1987; Overgaard et al., 2005; Wasser et al., 1991). It is noteworthy that during 12 weeks of anoxia, plasma-free  $Ca^{2+}$  levels gradually increase to 25 mequiv  $l^{-1}$  and total intracellular  $Ca^{2+}$  in heart increases from 1.5 to 5.7 mmol  $kg^{-1}$  (Jackson and Heisler, 1982, 1983). Additional studies measuring intracellular  $Ca^{2+}$  transients during anoxia and acidosis are needed to determine whether these extracellular and intracellular calcium changes are functionally important.

We have also provided further evidence that the ventricles from ectothermic vertebrates have a higher myofilament  $Ca^{2+}$  sensitivity compared with those of mammals. Although turtle  $Ca^{2+}$  sensitivity is intrinsically different from that of mammals, the effect of acidosis on  $Ca^{2+}$  sensitivity is not qualitatively different across species. Likewise, the effects of decreased pH and increased  $[P_i]$  on decreased tension development in turtles were not different from those measured in mammals. However, a decrease in  $Ca^{2+}$  sensitivity due to increased  $[P_i]$  previously observed in mammals was not observed in our studies of turtle. This suggests that  $P_i$  plays a larger role in mammals in decreasing both tension development and  $Ca^{2+}$  sensitivity, while acidosis is the main contributing factor in turtles.

### Acknowledgements

We thank Dr Charles Chung for his skillful experimental assistance, Dr Edward Debold for his useful discussion, and two anonymous reviewers for their constructive critiques and suggestions.

### Competing interests

The authors declare no competing or financial interests.

### Author contributions

Conceptualization: C.E.F., D.E.W.; Methodology: C.E.F., K.S.C., D.E.W.; Formal analysis: C.E.F., K.S.C.; Investigation: C.E.F., K.S.C., D.E.W.; Writing - original draft: C.E.F., D.E.W.; Writing - review & editing: C.E.F., K.S.C., D.E.W.; Supervision: D.E.W.; Project administration: D.E.W.; Funding acquisition: D.E.W.

### Funding

This work was supported by National Science Foundation CAREER grant 1253939 awarded to D.E.W.

### Supplementary information

Supplementary information available online at <http://jeb.biologists.org/lookup/doi/10.1242/jeb.164137.supplemental>

### References

- Barceñas-Ruiz, L. and Wier, W. G. (1987). Voltage dependence of intracellular  $[Ca^{2+}]_i$  transients in guinea pig ventricular myocytes. *Circ. Res.* **61**, 148–154.
- Bers, D. (1991). *Excitation-Contraction Coupling and Cardiac Contractile Force*. Netherlands: Springer.
- Boutlier, R. G. (2001). Mechanisms of cell survival in hypoxia and hypothermia. *J. Exp. Biol.* **204**, 3171–3181.
- Brandt, P. W., Colomo, F., Piroddi, N., Poggesi, C. and Tesi, C. (1998). Force regulation by  $Ca^{2+}$  in skinned single cardiac myocytes of frog. *Biophys. J.* **74**, 1994–2004.
- Campbell, K. S. and Holbrook, A. M. (2007). The rate of tension recovery in cardiac muscle correlates with the relative residual tension prevailing after restretch. *Am. J. Physiol. Heart Circ. Physiol.* **292**, H2020–H2022.
- Campbell, K. S. and Moss, R. L. (2000). A thixotropic effect in contracting rabbit psoas muscle: prior movement reduces the initial tension response to stretch. *J. Physiol.* **525**, 531–548.
- Campbell, K. S. and Moss, R. L. (2002). History-dependent mechanical properties of permeabilized rat soleus muscle fibers. *Biophys. J.* **82**, 929–943.
- Campbell, K. S. and Moss, R. L. (2003). SLControl: PC-based data acquisition and analysis for muscle mechanics. *Am. J. Physiol. Heart Circ. Physiol.* **285**, H2857–H2864.
- Campbell, K. S., Patel, J. R. and Moss, R. L. (2003). Cycling cross-bridges increase myocardial stiffness at submaximal levels of  $Ca^{2+}$  activation. *Biophys. J.* **84**, 3807–3815.
- Churcott, C. S., Moyes, C. D., Bressler, B. H., Baldwin, K. M. and Tibbitts, G. F. (1994). Temperature and pH effects on  $Ca^{2+}$  sensitivity of cardiac myofibrils: a comparison of trout with mammals. *Am. J. Physiol.* **267**, R62–R70.
- Cros, C., Salle, L., Warren, D. E., Shiels, H. A. and Brette, F. (2014). The calcium stored in the sarcoplasmic reticulum acts as a safety mechanism in rainbow trout heart. *Am. J. Physiol. Regul. Integr. Comp. Physiol.* **307**, R1493–R1501.
- Debold, E. P. (2012). Recent insights into muscle fatigue at the cross-bridge level. *Front Physiol.* **3**, 151.
- DuBell, W. H. and Houser, S. R. (1989). Voltage and beat dependence of  $Ca^{2+}$  transient in feline ventricular myocytes. *Am. J. Physiol.* **257**, H746–H759.
- Eisner, D. A., Elliott, A. C. and Smith, G. L. (1987). The contribution of intracellular acidosis to the decline of developed pressure in ferret hearts exposed to cyanide. *J. Physiol.* **391**, 99–108.
- Fabiato, A. (1982). Calcium release in skinned cardiac cells: variations with species, tissues, and development. *Fed. Proc.* **41**, 2238–2244.
- Fabiato, A. and Fabiato, F. (1978). Effects of pH on the myofilaments and the sarcoplasmic reticulum of skinned cells from cardiac and skeletal muscles. *J. Physiol.* **276**, 233–255.
- Farrell, A., Franklin, C., Arthur, P., Thorarensen, H. and Cousins, K. (1994). Mechanical performance of an in situ perfused heart from the turtle *Chrysemys scripta* during normoxia and anoxia at 5°C and 15°C. *J. Exp. Biol.* **191**, 207–229.
- Fitzsimons, D. P., Patel, J. R. and Moss, R. L. (2001). Cross-bridge interaction kinetics in rat myocardium are accelerated by strong binding of myosin to the thin filament. *J. Physiol.* **530**, 263–272.
- Galli, G. L. J., Gesser, H., Taylor, E. W., Shiels, H. A. and Wang, T. (2006a). The role of the sarcoplasmic reticulum in the generation of high heart rates and blood pressures in reptiles. *J. Exp. Biol.* **209**, 1956–1963.
- Galli, G. L. J., Taylor, E. W. and Shiels, H. A. (2006b). Calcium flux in turtle ventricular myocytes. *Am. J. Physiol. Regul. Integr. Comp. Physiol.* **291**, R1781–R1789.
- Galli, G. L. J., Warren, D. E. and Shiels, H. A. (2009).  $Ca^{2+}$  cycling in cardiomyocytes from a high-performance reptile, the varanid lizard (*Varanus exanthematicus*). *Am. J. Physiol. Regul. Integr. Comp. Physiol.* **297**, R1636–R1644.
- Gesser, H. and Jorgensen, E. (1982). pH<sub>i</sub>, contractility and Ca-balance under hypercapnic acidosis in the myocardium of different vertebrate species. *J. Exp. Biol.* **96**, 405–412.
- Godt, R. E., Fogaca, R. T. H. and Nosek, T. M. (1991). Changes in force and calcium sensitivity in the developing avian heart. *Can. J. Physiol. Pharmacol.* **69**, 1692–1697.
- Gwathmey, J. K. and Morgan, J. P. (1991). Calcium handling in myocardium from amphibian, avian, and mammalian species: the search for two components. *J. Comp. Physiol. B* **161**, 19–25.
- Harrison, S. M. and Bers, D. M. (1989). Influence of temperature on the calcium sensitivity of the myofilaments of skinned ventricular muscle from the rabbit. *J. Gen. Physiol.* **93**, 411–428.
- Harrison, S. M. and Bers, D. M. (1990). Temperature dependence of myofilament Ca sensitivity of rat, guinea pig, and frog ventricular muscle. *Am. J. Physiol.* **258**, C274–C281.



- Herbert, C. V. and Jackson, D. C.** (1985). Temperature effects on the responses to prolonged submergence in the turtle *Chrysemys picta bellii*. II. Metabolic rate, blood acid-base and ionic changes, and cardiovascular function in aerated and anoxic water. *Physiol. Zool.* **58**, 670–681.
- Hicks, J. M. and Farrell, A. P.** (2000). The cardiovascular responses of the redeared slider (*Trachemys scripta*) acclimated to either 22 or 5 degrees C. I. Effects of anoxic exposure on in vivo cardiac performance. *J. Exp. Biol.* **203**, 3765–3774.
- Hicks, J. W. and Wang, T.** (1998). Cardiovascular regulation during anoxia in the turtle: an in vivo study. *Physiol. Zool.* **71**, 1–14.
- Hove-Madsen, L., Llach, A. and Tort, L.** (1999). Quantification of calcium release from the sarcoplasmic reticulum in rainbow trout atrial myocytes. *Pflügers Arch.* **438**, 545–552.
- Jackson, D. C.** (1987). Cardiovascular function in turtles during anoxia and acidosis: In vivo and in vitro studies. *Am. Zool.* **27**, 49–58.
- Jackson, D.** (1997). Lactate accumulation in the shell of the turtle *Chrysemys picta bellii* during anoxia at 3 deg C and 10 deg C. *J. Exp. Biol.* **200**, 2295–2300.
- Jackson, D. C.** (2002). Hibernating without oxygen: physiological adaptations of the painted turtle. *J. Physiol.* **543**, 731–737.
- Jackson, D. C. and Heisler, N.** (1982). Plasma ion balance of submerged anoxic turtles at 3 degrees C: the role of calcium lactate formation. *Respir. Physiol.* **49**, 159–174.
- Jackson, D. C. and Heisler, N.** (1983). Intracellular and extracellular acid-base and electrolyte status of submerged anoxic turtles at 3 degrees C. *Respir. Physiol.* **53**, 187–201.
- Jackson, D. C., Shi, H., Singer, J. H., Hamm, P. H. and Lawler, R. G.** (1995). Effects of input pressure on in vitro turtle heart during anoxia and acidosis: a <sup>31</sup>P-NMR study. *Am. J. Physiol.* **268**, R683–R689.
- Jackson, D. C., Toney, V. I. and Okamoto, S.** (1996). Lactate distribution and metabolism during and after anoxia in the turtle, *Chrysemys picta bellii*. *Am. J. Physiol.* **271**, R409–R416.
- Jensen, M. A. and Gesser, H.** (1999). Influence of inorganic phosphate and energy state on force in skinned cardiac muscle from freshwater turtle and rainbow trout. *J. Comp. Physiol. B* **169**, 439–444.
- Keiver, K. M. and Hochachka, P. W.** (1991). Catecholamine stimulation of hepatic glycogenolysis during anoxia in the turtle *Chrysemys picta*. *Am. J. Physiol.* **261**, R1341–R1345.
- Keiver, K. M., Weinberg, J. and Hochachka, P. W.** (1992). The effect of anoxic submergence and recovery on circulating levels of catecholamines and corticosterone in the turtle, *Chrysemys picta*. *Gen. Comp. Endocrinol.* **85**, 308–315.
- Kentish, J. C.** (1986). The effects of inorganic phosphate and creatine phosphate on force production in skinned muscles from rat ventricle. *J. Physiol.* **370**, 585–604.
- Kentish, J. C.** (1991). Combined inhibitory actions of acidosis and phosphate on maximum force production in rat skinned cardiac muscle. *Pflügers Arch.* **419**, 310–318.
- Knuth, S. T., Dave, H., Peters, J. R. and Fitts, R. H.** (2006). Low cell pH depresses peak power in rat skeletal muscle fibres at both 30 degrees C and 15 degrees C: implications for muscle fatigue. *J. Physiol.* **575**, 887–899.
- Morad, M., Sanders, C. and Weiss, J.** (1981). The inotropic actions of adrenaline on frog ventricular muscle: relaxing versus potentiating effects. *J. Physiol.* **311**, 585–604.
- Morano, I., Arndt, H., Gartner, C. and Ruegg, J. C.** (1988). Skinned fibers of human atrium and ventricle: myosin isoenzymes and contractility. *Circ. Res.* **62**, 632–639.
- Nelson, C. R. and Fitts, R. H.** (2014). Effects of low cell pH and elevated inorganic phosphate on the pCa-force relationship in single muscle fibers at near-physiological temperatures. *Am. J. Physiol. Cell Physiol.* **306**, C670–C678.
- Nelson, C. R., Debold, E. P. and Fitts, R. H.** (2014). Phosphate and acidosis act synergistically to depress peak power in rat muscle fibers. *Am. J. Physiol. Cell Physiol.* **307**, C939–C950.
- Orchard, C. H. and Kentish, J. C.** (1990). Effects of changes of pH on the contractile function of cardiac muscle. *Am. J. Physiol.* **258**, C967–C981.
- Orchard, C. H., Hamilton, D. L., Astles, P., McCall, E. and Jewell, B. R.** (1991). The effect of acidosis on the relationship between Ca<sup>2+</sup> and force in isolated ferret cardiac muscle. *J. Physiol.* **436**, 559–578.
- Overgaard, J., Wang, T., Nielsen, O. B. and Gesser, H.** (2005). Extracellular determinants of cardiac contractility in the cold anoxic turtle. *Physiol. Biochem. Zool.* **78**, 976–995.
- Palmer, S. and Kentish, J. C.** (1994). The role of troponin C in modulating the Ca<sup>2+</sup> sensitivity of mammalian skinned cardiac and skeletal muscle fibres. *J. Physiol.* **480**, 45–60.
- Pate, E., Bhimani, M., Franks-Skiba, K. and Cooke, R.** (1995). Reduced effect of pH on skinned rabbit psoas muscle mechanics at high temperatures: implications for fatigue. *J. Physiol.* **486**, 689–694.
- Shi, H. and Jackson, D. C.** (1997). Effects of anoxia, acidosis and temperature on the contractile properties of turtle cardiac muscle strips. *J. Exp. Biol.* **200**, 1965–1973.
- Shi, H., Hamm, P. H., Lawler, R. G. and Jackson, D. C.** (1999). Different effects of simple anoxic lactic acidosis and simulated in vivo anoxic acidosis on turtle heart. *Comp. Biochem. Physiol. A Mol. Integr. Physiol.* **122**, 173–180.
- Shiels, H. A. and Galli, G. L.** (2014). The sarcoplasmic reticulum and the evolution of the vertebrate heart. *Physiology (Bethesda)* **29**, 456–469.
- Smith, G. L. and Steele, D. S.** (1994). Effects of pH and inorganic phosphate on rigor tension in chemically skinned rat ventricular trabeculae. *J. Physiol.* **478**, 505–512.
- Solaro, R. J., Lee, J. A., Kentish, J. C. and Allen, D. G.** (1988). Effects of acidosis on ventricular muscle from adult and neonatal rats. *Circ. Res.* **63**, 779–787.
- Stecyk, J. A., Overgaard, J., Farrell, A. P. and Wang, T.** (2004). Alpha-adrenergic regulation of systemic peripheral resistance and blood flow distribution in the turtle *Trachemys scripta* during anoxic submergence at 5 degrees C and 21 degrees C. *J. Exp. Biol.* **207**, 269–283.
- Stecyk, J. A., Bock, C., Overgaard, J., Wang, T., Farrell, A. P. and Portner, H. O.** (2009). Correlation of cardiac performance with cellular energetic components in the oxygen-deprived turtle heart. *Am. J. Physiol. Regul. Integr. Comp. Physiol.* **297**, R756–R768.
- Takagi, Y., Shuman, H. and Goldman, Y. E.** (2004). Coupling between phosphate release and force generation in muscle actomyosin. *Philos. Trans. R. Soc. Lond. B Biol. Sci.* **359**, 1913–1920.
- Tibbits, G. F., Hove-Madsen, L. and Bers, D. M.** (1991). Calcium transport and the regulation of cardiac contractility in teleosts: a comparison with higher vertebrates. *Can. J. Zool.* **69**, 2014–2019.
- Uitsch, G. R. and Jackson, D. C.** (1982). Long-term submergence at 3 degrees C of the turtle *Chrysemys picta bellii* in normoxic and severely hypoxic water. III. Effects of changes in ambient PO<sub>2</sub> and subsequent air breathing. *J. Exp. Biol.* **97**, 87–99.
- Vornanen, M.** (1989). Basic functional properties of the cardiac muscle of the common shrew (*Sorex araneus*) and some other small mammals. *J. Exp. Biol.* **145**, 339–351.
- Vornanen, M. and Haverinen, J.** (2013). A significant role of sarcoplasmic reticulum in cardiac contraction of a basal vertebrate, the river lamprey (*Lampetra fluviatilis*). *Acta Physiol. (Oxf.)* **207**, 269–279.
- Warren, D. E. and Jackson, D. C.** (2007). Effects of temperature on anoxic submergence: skeletal buffering, lactate distribution, and glycogen utilization in the turtle, *Trachemys scripta*. *Am. J. Physiol. Regul. Integr. Comp. Physiol.* **293**, R458–R467.
- Warren, D. E., Galli, G. L. J., Patrick, S. M. and Shiels, H. A.** (2010). The cellular force-frequency response in ventricular myocytes from the varanid lizard, *Varanus exanthematicus*. *Am. J. Physiol. Regul. Integr. Comp. Physiol.* **298**, R567–R574.
- Wasser, J. S., Freund, E. V., Gonzalez, L. A. and Jackson, D. C.** (1990a). Force and acid-base state of turtle cardiac tissue exposed to combined anoxia and acidosis. *Am. J. Physiol.* **259**, R15–R20.
- Wasser, J. S., Inman, K. C., Arendt, E. A., Lawler, R. G. and Jackson, D. C.** (1990b). <sup>31</sup>P-NMR measurements of pHi and high-energy phosphates in isolated turtle hearts during anoxia and acidosis. *Am. J. Physiol.* **259**, R521–R530.
- Wasser, J. S., Warburton, S. J. and Jackson, D. C.** (1991). Extracellular and intracellular acid-base effects of submergence anoxia and nitrogen breathing in turtles. *Respir. Physiol.* **83**, 239–252.
- Wilkie, D. R.** (1986). Muscular fatigue: effects of hydrogen ions and inorganic phosphate. *Fed. Proc.* **45**, 2921–2923.
- Wilson, J. R., McCully, K. K., Mancini, D. M., Boden, B. and Chance, B.** (1988). Relationship of muscular fatigue to pH and diprotonated Pi in humans: a <sup>31</sup>P-NMR study. *J. Appl. Physiol.* **64**, 2333–2339.
